# Supplementary material for: Efficacy and safety of endoscopic ultrasound-guided pancreatic duct drainage (EUS-PDD): A systematic review and meta-analysis of 714 patients
Source: PubMed Central journal article supplement — Endosc Int Open. 2020 Oct 22;8(11):E1664–72. doi: 10.1055/a-1236-3350 (PMC7581476; doi:10.1055/a-1236-3350), 2020-10-22
Supplement: 1982supmat_10-1055-a-1236-3350.pdf [file 1982supmat_10-1055-a-1236-3350.pdf]

# Supplementary material

## SUPPLEMENTARY MATERIALS

Efficacy and safety of endoscopic ultrasound (EUS) guided pancreatic duct drainage: a systematic review and meta-analysis of 714 patients

Saurabh Chandan, Babu P. Mohan, Shahab R. Khan, Lena L. Kassab, Suresh Ponnada, Andrew Ofose, Ishfaq Bhat, Shailender Singh, Douglas C. Adler

## SUPPLEMENTARY MATERIALS LEGEND

**Supplementary Table 1** Study and population characteristics.

**Supplementary Table 2** EUS-PDD adverse events.

**Supplementary Table 3** Study quality assessment.

**Supplementary Fig. 1** PRISMA study selection flowchart. From: Moher D, Liberati A, Tetzlaff J, Altman DG, The PRISMA Group (2009). Preferred Reporting Items for Systematic Reviews and Meta-Analyses: The PRISMA Statement. *PLoS Med* 6(7): e1000097. doi:10.1371/journal.pmed1000097

**Supplementary Fig. 2** Forest plot of technical success of subgroups by geography.

**Supplementary Fig. 3** Forest plot of clinical success of subgroups by geography.

**Supplementary Fig. 4** Forest plot of mild adverse events.

**Supplementary Fig. 5** Forest plot of moderate adverse events.

**Supplementary Fig. 6** Forest plot of severe adverse events.

**Supplementary Fig. 7** Funnel plot of publication bias.

**Appendix 1** Literature search strategy.

**Appendix 2** MOOSE checklist. From: Stroup DF, Berlin JA, Morton SC et al. for the Meta-analysis Of Observational Studies in Epidemiology (MOOSE) Group. Meta-analysis of Observational Studies in Epidemiology. A Proposal for Reporting. *JAMA*. 2000;283(15):2008-2012. doi: 10.1001/jama.283.15.2008

**Appendix 3** PRISMA checklist. From: Moher D, Liberati A, Tetzlaff J, Altman DG, The PRISMA Group (2009). Preferred Reporting Items for Systematic Reviews and Meta-Analyses: The PRISMA Statement. *PLoS Med* 6(7): e1000097. doi:10.1371/journal.pmed1000097

## Supplementary material

Supplementary Table 1 Study and population characteristics.

| Name            | Study information                                                                | Mean age (years) | Male/female | Total patients | Total procedures | Malignant | Benign | Indications                                                                                                                                                     | Reasons for failed cannulation                                                                                  | Main pancreatic duct diameter (mm) | Route of access (fg: trans gastric; td: trans duodenal; rz: rendezvous) | Technical success (success of pancreatogram/ PD wire/Duodenal wire) | Clinical success (drained) | PD success | Route of drainage (ad: anterograde drainage; rd: retrograde drainage; ti: transluminal) | Lost F/U time to f/u |                     |
|-----------------|----------------------------------------------------------------------------------|------------------|-------------|----------------|------------------|-----------|--------|-----------------------------------------------------------------------------------------------------------------------------------------------------------------|-----------------------------------------------------------------------------------------------------------------|------------------------------------|-------------------------------------------------------------------------|---------------------------------------------------------------------|----------------------------|------------|-----------------------------------------------------------------------------------------|----------------------|---------------------|
| Barkay, 2010    | Retrospective, single center, Mar 1999 to Jan 2009, Israel                       | 45 (21-71)       | 6/15        | 21             | NR               | 0         | 21     | NR                                                                                                                                                              | 6 sphincter stenosis, 6 anastomotic stricture, 2 pancreatic duct stricture, 5 minor papilla not found, 2 others | > 4 mm (14 Normal (7))             | NR                                                                      | 10                                                                  | 8                          | 18         | NR                                                                                      | NR                   |                     |
| Chen, 2017      | Retrospective, multicenter, Jan 2010 to Aug 2015, USA Europe Asia South America. | 58.7 (11.9)      | 22/18       | 40             | NR               | 42        | NR     | Benign anastomotic stricture = 17, chronic pancreatitis = 7, dilated MPD=9, others=7                                                                            | All post Whipples surgery                                                                                       | 5.8 (2)                            | NR                                                                      | 37                                                                  | 35                         | 39         | 15 ad, 3 rd, 21 ti                                                                      | NR 7.8m (IOR 17.1)   |                     |
| Dalal, 2020     | Retrospective, single center, Jan 2013 to Dec 2018, India.                       | 43.5 (10.6)      | 29/15       | 44             | NR               | NR        | NR     | 38 - pain due to chronic pancreatitis, 6 - ascites due to disrupted duct                                                                                        | 15 - obstructing stone, 11 - tight stricture, 5 disrupted duct, 4 pancreatic divisum, 4 diverticulum            | 5.8 (2.7-8.3)                      | 18 fg, 3 td, 23 rz                                                      | 39                                                                  | 36                         | 39         | NR                                                                                      | 0                    | NR                  |
| Ergun, 2011     | Retrospective, single center, Jan 2000 to Nov 2009, Belgium                      | 36 - 78          | 14/6        | 20             | 24               | 8         | 12     | Chronic pancreatitis - 10, post Whipple Symptomatic anastomotic stricture - 10                                                                                  | NR                                                                                                              | 8.1 (4.1)                          | 12 fg, 3 td, 5 rz                                                       | 18                                                                  | 13                         | 18         | 13 ad, 5 rd, 15 ti                                                                      | NR 37m (3-120)       |                     |
| Fujii, 2013     | Retrospective, single center, Jan 2006 to Dec 2012, USA                          | 57 (16)          | 24/21       | 43             | 45               | 1         | 44     | Recurrent acute pancreatitis - 30, chronic pancreatitis - 8, pancreatic duct leak - 3, abdominal pain and dilated MPD - 23, weight loss - 8 and steatorrhea - 5 | 29 prior pancreatic surgery structures, 9 pancreatic divisum                                                    | 5.9 (2.3)                          | 41 fg, 1 td                                                             | 32                                                                  | 30                         | 32         | 18 ad, 14 rd                                                                            | 3 37m (12-72)        |                     |
| Godat, 2019a    | Retrospective, multicenter, Apr 2016 to Mar 2019, Switzerland                    | 56               | 34/12       | 46             | NR               | NR        | NR     | NR                                                                                                                                                              | NR                                                                                                              | 6 (3-18)                           | NR                                                                      | 42                                                                  | 39                         | NR         | NR                                                                                      | NR                   | NR                  |
| Hasegawa, 2019a | Retrospective, single center, Oct 2010 to Apr 2019, Japan.                       | 68 (39-78)       | 10/4        | 14             | NR               | 1         | 13     | Recurrent acute pancreatitis                                                                                                                                    | 10 chronic pancreatitis related duct stricture, 2 anastomotic stricture, 1 malignancy, 1 other                  | NR                                 | 7 rz                                                                    | 12                                                                  | 12                         | NR         | 7 rz                                                                                    | NR                   | NR                  |
| Honjo, 2018     | Retrospective, multicenter, Apr 2015 to Mar 2016, Japan.                         | 68.9 (13.8)      | NR          | 15             | NR               | 1         | 14     | NR                                                                                                                                                              | 11 anastomotic stricture, 3 chronic pancreatitis related duct stricture, 1 malignancy                           | NR                                 | NR                                                                      | 14                                                                  | 13                         | NR         | NR                                                                                      | 0                    | NR                  |
| Kahaleh, 2007   | Retrospective, single center, Jan 2002 to Jul 2005, USA                          | 54 (12)          | 5/8         | 13             | NR               | 1         | 12     | 7 surgical stricture, 5 pancreatitis, 1 IPMN                                                                                                                    | 3 chronic pancreatitis related duct stricture, 1 malignancy, 2 others                                           | 5.7 (4.9)                          | NR                                                                      | 10                                                                  | NR                         | NR         | 13 ti stenting                                                                          | 1                    | NR                  |
| Kato, 2016a     | Retrospective, single center, Japan                                              | 65               | 10/2        | 12             | NR               | 5         | 7      | 4 chronic pancreatitis, 3 postsurgical stricture, 5 malignancy                                                                                                  | NR                                                                                                              | NR                                 | NR                                                                      | 10                                                                  | 10                         | NR         | NR                                                                                      | NR                   | 147 days (19 - 414) |
| Kurihara, 2013  | Retrospective, single center, Feb 2010 to Apr 2012, Japan                        | 64.6 (54-81)     | 8/6         | 14             | 17               | 0         | 17     | Acute pancreatitis - 14, abdominal pain - 2, chronic pancreatitis - 1                                                                                           | 14 pancreatoduodenostomy & pancreatojejunostomy strictures                                                      | 4.94 mm (Calculated)               | 11 rz, 3 tg                                                             | 15                                                                  | 15                         | 15         | 1 ad, 11 rd, 15 ti                                                                      | NR                   | NR                  |
| Lee, 2012a      | Retrospective, single center, Jun 2007 to Jun 2011, Japan                        | NR               | NR          | 29             | NR               | NR        | NR     | NR                                                                                                                                                              | NR                                                                                                              | 7.6 (2.5-31)                       | 22 fg, 4 td, 2 rz                                                       | 26                                                                  | 18                         | NR         | NR                                                                                      | 1                    | 378 days (8-821)    |
| Matsunami, 2018 | Retrospective, single center, Aug 2013 to Apr 2017, Japan                        | 60.6 (14.3)      | 14/16       | 30             | NR               | 2         | 28     | Acute recurrent pancreatitis due to 21 anastomotic stenosis, 6 chronic pancreatitis, 1 pancreatic cancer                                                        | 9 tight strictures, 21 site inaccessible (5 had disconnected pancreatic duct)                                   | 3.5 ± 2.9 (1 - 14) mm              | 30                                                                      | 30                                                                  | NR                         | NR         | NR                                                                                      | 5                    | 23m (6-44)          |
| Oh, 2016        | Retrospective, single center, Jul 2013 to Dec 2014, Japan                        | 53 (41-65.5)     | 16/9        | 25             | NR               | NR        | NR     | 15 recurrent acute pancreatitis, 10 chronic pancreatitis                                                                                                        | 13 tight MPD strictures, 10 surgically altered anatomy, 2 duodenal obstruction                                  | 5.1 (IOR 4.4- 7.65)                | 23 fg, 1 td, 1 ti                                                       | 25                                                                  | 25                         | NR         | NR                                                                                      | 5                    | 221.1 (100.48)d     |
| Oh, 2019        | Retrospective, single center, Dec 2014 to Sep 2017, Japan                        | 63 (51-68)       | 63/11       | 23             | NR               | 9         | 14     | symptomatic strictures                                                                                                                                          | 13 pancreatoduodenectomy, 10 pylorus-preserving pancreaticoduodenectomy                                         | 4.8 (3.8-6.3)                      | 22 tg                                                                   | 23                                                                  | 23                         | NR         | 6 ti, 17 rz                                                                             | 3                    | NR                  |

## Supplementary material

|                      |                                                                     |               |       |    |     |    |    |    |                                                                                                 |    |              |
|----------------------|---------------------------------------------------------------------|---------------|-------|----|-----|----|----|----|-------------------------------------------------------------------------------------------------|----|--------------|
| Tessier, 2007        | USA<br>Retrospective multicenter, Sep 2000 to Dec 2004, Belgium     | 51/2 (14/71)  | 36    | 9  | 27  | 33 | 25 | 33 | 36 tl stenting                                                                                  | 6  | 14.5m (4-55) |
| Trikudanathan, 2018a | Retrospective, single center, Oct 2010 to Nov 2018, USA             | 54            | 22/34 | 56 | 63  | NR | NR | NR | NR                                                                                              | NR | NR           |
| Tyberg, 2017         | Retrospective, multicenter, Jan 2006 to Dec 2015, USA France Brazil | 58/2 (15/5)   | 50/30 | 80 | 80  | 66 | 14 | 30 | Pain: 50; pancreatitis: 30                                                                      | NR | NR           |
| Uchida, 2018         | Retrospective, single center, Sep 2012 to Dec 2017, Japan           | 43-88         | 11/4  | 15 | 15  | 7  | 8  | NR | 6 anastomotic stricture, 2 chronic pancreatitis stricture, 7 malignant obstructive pancreatitis | NR | NR           |
| Vila, 2012           | Retrospective, multicenter, Sep 2010, Spain                         | 69/03 (11/24) | 11/8  | 19 | 19  | 13 | 6  | NR | NR                                                                                              | NR | NR           |
| Will, 2015           | Retrospective, single center, Jun 2002 to Apr 2014, Germany         | 54 (28-87)    | 60/34 | 94 | 111 | NR | NR | NR | 15 pancreatic divisum, 9 disconnected pancreatic tail, 30 postsurgical fluid retention          | NR | NR           |

PD, pancreatic duct; tg, transgastric; td, transduodenal; tl, transluminal; rz, rendezvous; NR, not reported

## Supplementary material

Supplementary Table 2 EUS-PDD adverse events.

| Name            | Total patients (include 10 and above) | Total number of adverse events (n) | Pancreatitis | Bleeding | Perforation/<br>pneumoperitoneum | Pancreatic leak/PFC | Infection | Post-procedure abdominal pain (requiring hospitalization) | Other/miscellaneous complications | Stent-related AE                           | Reintervention | ASGE adverse events lexicon; Mild (procedure aborted, post procedure medical consultation, unplanned hospital admission or prolongation of hospital stay < 3 nights) | Moderate (unplanned vent support, unplanned admission or prolongation of stay 4-10 days, ICU admission for 1 night, repeat endoscopy, IR intervention, intervention for integument injuries) | Severe (unplanned admission for > 10 nights, ICU > 1 night, surgery for AE, permanent disability) |
|-----------------|---------------------------------------|------------------------------------|--------------|----------|----------------------------------|---------------------|-----------|-----------------------------------------------------------|-----------------------------------|--------------------------------------------|----------------|----------------------------------------------------------------------------------------------------------------------------------------------------------------------|----------------------------------------------------------------------------------------------------------------------------------------------------------------------------------------------|---------------------------------------------------------------------------------------------------|
| Barkay, 2010    | 21                                    | 2                                  | 0            | 0        | 0                                | 0                   | 1         | NR                                                        | 1 stripping of wire               | NR                                         | NR             | 2                                                                                                                                                                    | 0                                                                                                                                                                                            | 0                                                                                                 |
| Chen, 2017      | 40                                    | 15                                 | 0            | 0        | 0                                | 0                   | 1         | 13                                                        | 1 abdominal abscess               | 1                                          | 0              | 8                                                                                                                                                                    | 8                                                                                                                                                                                            | 0                                                                                                 |
| Dalal, 2020     | 44                                    | 10                                 | 2            | 1        | 0                                | 0                   | 0         | 4                                                         | 1 stripping of wire               | 12 block, 5 migration                      | NR             | 10                                                                                                                                                                   | 0                                                                                                                                                                                            | 0                                                                                                 |
| Ergun, 2011     | 20                                    | 2                                  | 0            | 1        | 0                                | 0                   | 0         | 0                                                         | 1 perigastric collection          | 9                                          | 4              | 11                                                                                                                                                                   | 0                                                                                                                                                                                            | 0                                                                                                 |
| Fujii, 2013     | 43                                    | 3                                  | 1            | 0        | 0                                | 0                   | 1         | 13                                                        | 1 peripancreatic abscess          | 8 stent dysfunction                        | 2              | 13                                                                                                                                                                   | 3                                                                                                                                                                                            | 0                                                                                                 |
| Godat, 2019a    | 46                                    | 10                                 | NR           | NR       | NR                               | NR                  | NR        | NR                                                        | NR                                | NR                                         | NR             | 5                                                                                                                                                                    | 0                                                                                                                                                                                            | 5                                                                                                 |
| Hasegawa, 2019a | 14                                    | 5                                  | 2            | 0        | 0                                | 0                   | 0         | NR                                                        | NR                                | NR                                         | NR             | 5                                                                                                                                                                    | 0                                                                                                                                                                                            | 0                                                                                                 |
| Honjo, 2018     | 15                                    | 3                                  | 0            | 0        | 0                                | 0                   | 0         | 2                                                         | None                              | NR                                         | NR             | 0                                                                                                                                                                    | 1                                                                                                                                                                                            | 0                                                                                                 |
| Kahaleh, 2007   | 13                                    | 2                                  | 0            | 1        | 2                                | 0                   | 0         | NR                                                        | None                              | NR                                         | NR             | 0                                                                                                                                                                    | 2                                                                                                                                                                                            | 0                                                                                                 |
| Kato, 2016a     | 12                                    | 2                                  | 0            | 2        | 0                                | 0                   | 0         | NR                                                        | None                              | 3 migration                                | NR             | 0                                                                                                                                                                    | 2                                                                                                                                                                                            | 0                                                                                                 |
| Kurihara, 2013  | 14                                    | 1                                  | 0            | 0        | 0                                | 0                   | 0         | NR                                                        | 1 aneurysm/pseudocyst             | NR                                         | NR             | 0                                                                                                                                                                    | 1                                                                                                                                                                                            | 0                                                                                                 |
| Lee, 2012a      | 29                                    | 2                                  | 0            | 0        | 2                                | 0                   | 0         | 0                                                         | NR                                | 4 migration, 6 occlusion                   | NR             | NR                                                                                                                                                                   | NR                                                                                                                                                                                           | NR                                                                                                |
| Matsunami, 2018 | 30                                    | 2                                  | 1            | 1        | 0                                | 0                   | 0         | 5                                                         | None                              | 6 stent dislodgement                       | 5              | 1                                                                                                                                                                    | 1                                                                                                                                                                                            |                                                                                                   |
| Oh, 2016        | 25                                    | 1                                  | 0            | 1        | 0                                | 0                   | 0         | 4                                                         | None                              | 0                                          | 5 (early)      | 0                                                                                                                                                                    | 0                                                                                                                                                                                            | 0                                                                                                 |
| Oh, 2019        | 23                                    | 4                                  | 0            | 0        | 0                                | 1                   | 0         | 3                                                         | None                              | 1 occlusion, 3 stent fracture, 1 migration | NR             | 0                                                                                                                                                                    | 0                                                                                                                                                                                            | 0                                                                                                 |
| Shah, 2012      | 25                                    | 4                                  | 3            | 0        | 1                                | 0                   | 0         | NR                                                        | 0                                 | NR                                         | NR             | NR                                                                                                                                                                   | NR                                                                                                                                                                                           | NR                                                                                                |
| Tessier, 2007   | 36                                    | 5                                  | 1            | 1        | 0                                | 0                   | 0         | NR                                                        | 3                                 | 11 obstruction, 16 migration, 1 fracture   | 6              | 3                                                                                                                                                                    | 0                                                                                                                                                                                            | 2                                                                                                 |

## Supplementary material

|                      |    |    |   |   |   |   |   |    |               |                              |    |    |    |    |
|----------------------|----|----|---|---|---|---|---|----|---------------|------------------------------|----|----|----|----|
| Trikudanathan, 2019a | 56 | 8  | 8 | 0 | 0 | 0 | 0 | NR | NR            | NR                           | NR | 0  | 6  | 2  |
| Tyberg, 2017         | 80 | 25 | 8 | 1 | 2 | 2 | 4 | 4  | None          | NR                           | NR | 5  | 19 | 1  |
| Uchida, 2018         | 15 | 4  | 0 | 1 | 0 | 1 | 0 | NR | 1 peritonitis | 1 stent migration            | 4  | 2  | 2  | 0  |
| Vila, 2012           | 19 | 1  | 0 | 0 | 0 | 0 | 0 | NR | 0             | NR                           | NR | NR | NR | NR |
| Will, 2015           | 94 | 24 | 0 | 6 | 1 | 0 | 0 | NR | None          | 2 dislocation, 17 occlusions | 2  | 2  | 20 | 2  |

EUS-PDD, endoscopic ultrasound-guided pancreatic duct drainage; PFC, pancreatic fluid collection; ICU, intensive care unit; AE, adverse event; NR, not reported.

# Supplementary material

Supplementary Table 3 Study quality assessment.

| Study                | Selection                                            |                   | Cohort size | Information on clinical outcomes | Outcome not present at start | Comparability | Outcome assessment | Follow up time | Adequacy of follow-up | Score | Quality |
|----------------------|------------------------------------------------------|-------------------|-------------|----------------------------------|------------------------------|---------------|--------------------|----------------|-----------------------|-------|---------|
|                      | Representativeness of the average adult in community | Population based: |             |                                  |                              |               |                    |                |                       |       |         |
| Barkay, 2010         | 0                                                    | 0                 | 0.5         | 1                                | 1                            | 1             | 1                  | 0              | 0                     | 4.5   | Medium  |
| Chen, 2017           | 0.5                                                  | 1                 | 1           | 1                                | 1                            | 1             | 1                  | 0              | 0                     | 6.5   | High    |
| Dalai, 2020          | 0                                                    | 1                 | 1           | 1                                | 1                            | 1             | 1                  | 0              | 1                     | 6     | Medium  |
| Ergun, 2011          | 0                                                    | 1                 | 0.5         | 1                                | 1                            | 1             | 1                  | 0              | 0                     | 5.5   | Medium  |
| Fujii, 2013          | 0                                                    | 1                 | 1           | 1                                | 1                            | 1             | 1                  | 0.5            | 0.5                   | 6.5   | High    |
| Godat, 2019a         | 0.5                                                  | 1                 | 1           | 1                                | 1                            | 1             | 1                  | 0              | 0                     | 5.5   | Medium  |
| Hasegawa, 2019a      | 0                                                    | 1                 | 1           | 1                                | 1                            | 1             | 1                  | 0              | 0                     | 4     | Medium  |
| Honjo, 2018          | 0.5                                                  | 0                 | 0           | 1                                | 1                            | 1             | 1                  | 0              | 1                     | 5.5   | Medium  |
| Kahaleh, 2007        | 0                                                    | 1                 | 0           | 1                                | 1                            | 1             | 1                  | 0              | 0.5                   | 4.5   | Medium  |
| Kato, 2016a          | 0                                                    | 1                 | 0           | 1                                | 1                            | 1             | 1                  | 0              | 0                     | 5     | Medium  |
| Kurihara, 2013       | 0                                                    | 1                 | 0           | 1                                | 1                            | 1             | 1                  | 0              | 0                     | 4     | Medium  |
| Lee, 2012a           | 0                                                    | 0.5               | 1           | 1                                | 1                            | 1             | 1                  | 0.5            | 0.5                   | 6     | Medium  |
| Matsunami, 2018      | 0                                                    | 0.5               | 1           | 1                                | 1                            | 1             | 1                  | 0.5            | 0.5                   | 6     | Medium  |
| Oh, 2016             | 0                                                    | 0.5               | 1           | 1                                | 1                            | 1             | 1                  | 0.5            | 0.5                   | 6     | Medium  |
| Oh, 2019             | 0                                                    | 0.5               | 1           | 1                                | 1                            | 1             | 1                  | 0              | 0.5                   | 5     | Medium  |
| Shah, 2012           | 0                                                    | 0.5               | 1           | 1                                | 1                            | 1             | 1                  | 0              | 0                     | 4.5   | Medium  |
| Tessier, 2007        | 0.5                                                  | 1                 | 0.5         | 1                                | 1                            | 1             | 1                  | 1              | 0.5                   | 6.5   | High    |
| Trikudanathan, 2019a | 0                                                    | 1                 | 1           | 1                                | 1                            | 1             | 1                  | 0              | 0                     | 5     | Medium  |
| Tyberg, 2017         | 0.5                                                  | 1                 | 1           | 1                                | 1                            | 1             | 1                  | 1              | 0.5                   | 7     | High    |
| Uchida, 2018         | 0                                                    | 0.5               | 1           | 1                                | 1                            | 1             | 1                  | 0              | 0                     | 5.5   | Medium  |
| Vila, 2012           | 0.5                                                  | 1                 | 0.5         | 1                                | 1                            | 1             | 1                  | 0              | 0.5                   | 5.5   | Medium  |
| Will, 2015           | 0                                                    | 1                 | 1           | 1                                | 1                            | 1             | 1                  | 1              | 0.5                   | 6.5   | HIGH    |

## Supplementary material

**Supplementary Fig. 1** PRISMA study selection flowchart. From: Moher D, Liberati A, Tetzlaff J, Altman DG, The PRISMA Group (2009). Preferred Reporting Items for Systematic Reviews and Meta-Analyses: The PRISMA Statement. PLoS Med 6(7): e1000097. doi:10.1371/journal.pmed1000097

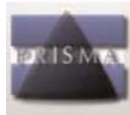

### PRISMA 2009 Flow Diagram

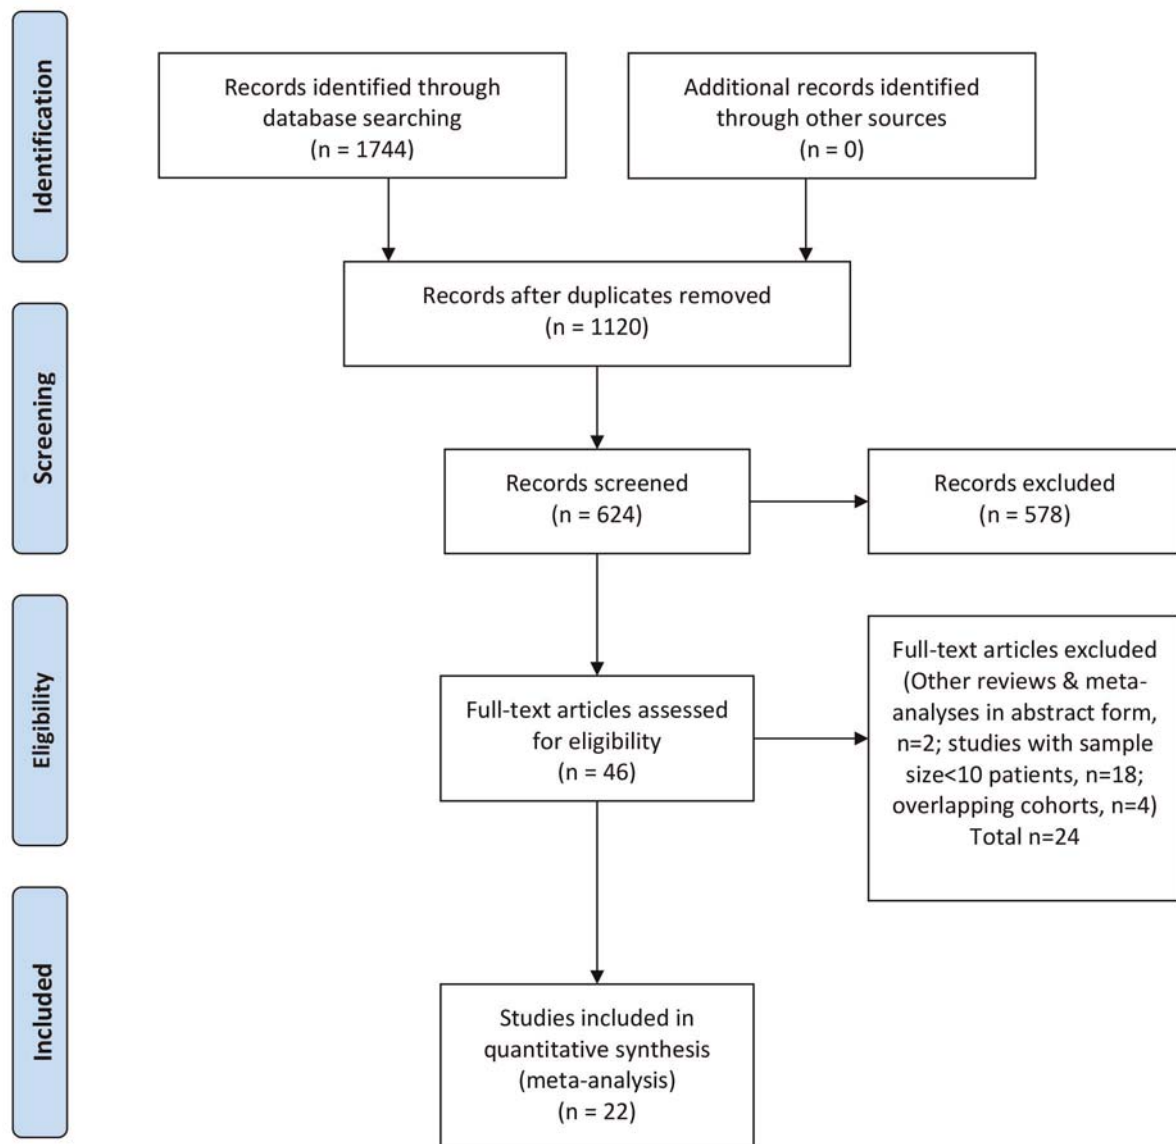



## Supplementary material

**Supplementary Fig. 2** Forest plot of technical success of subgroups by geography.

### Technical success (by geography)

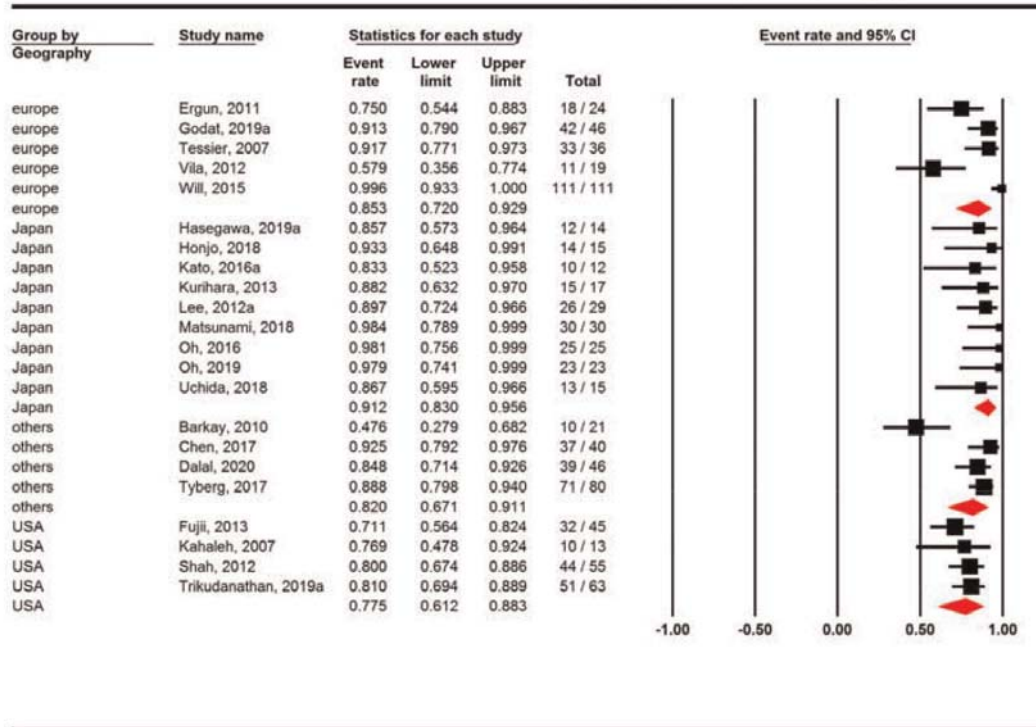

Meta Analysis



## Supplementary material

**Supplementary Fig. 3** Forest plot of clinical success of subgroups by geography.

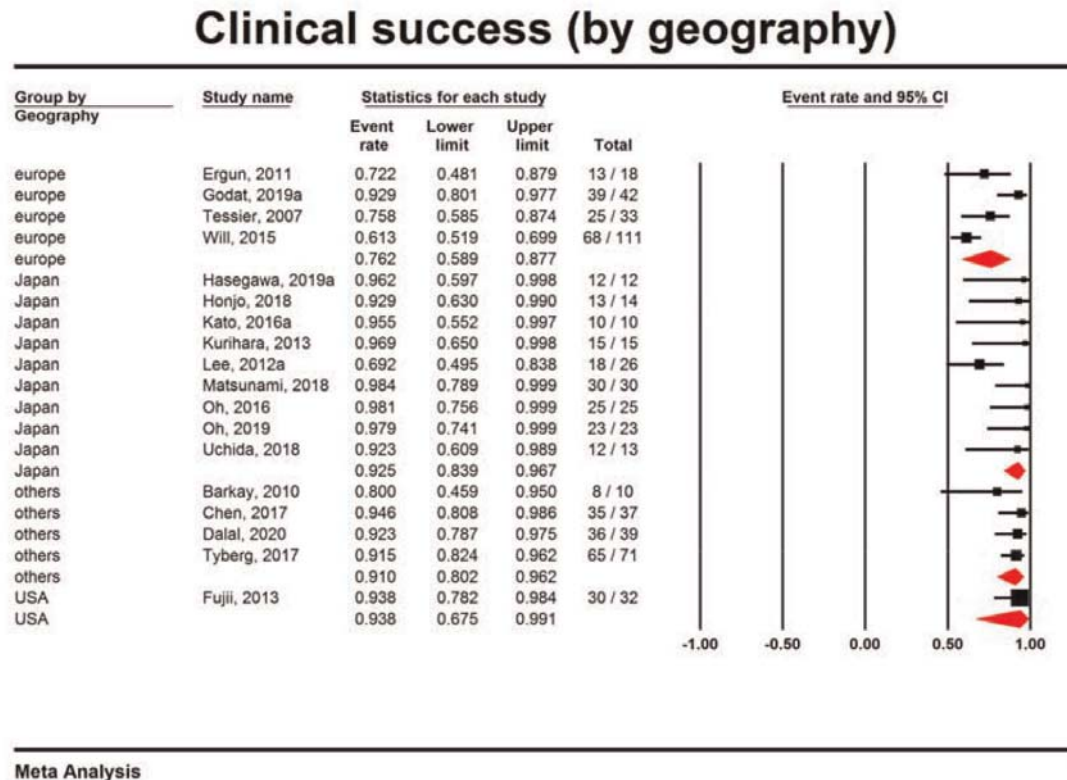

## Supplementary material

Supplementary Fig. 4 Forest plot of mild adverse events.

### Adverse events (mild)

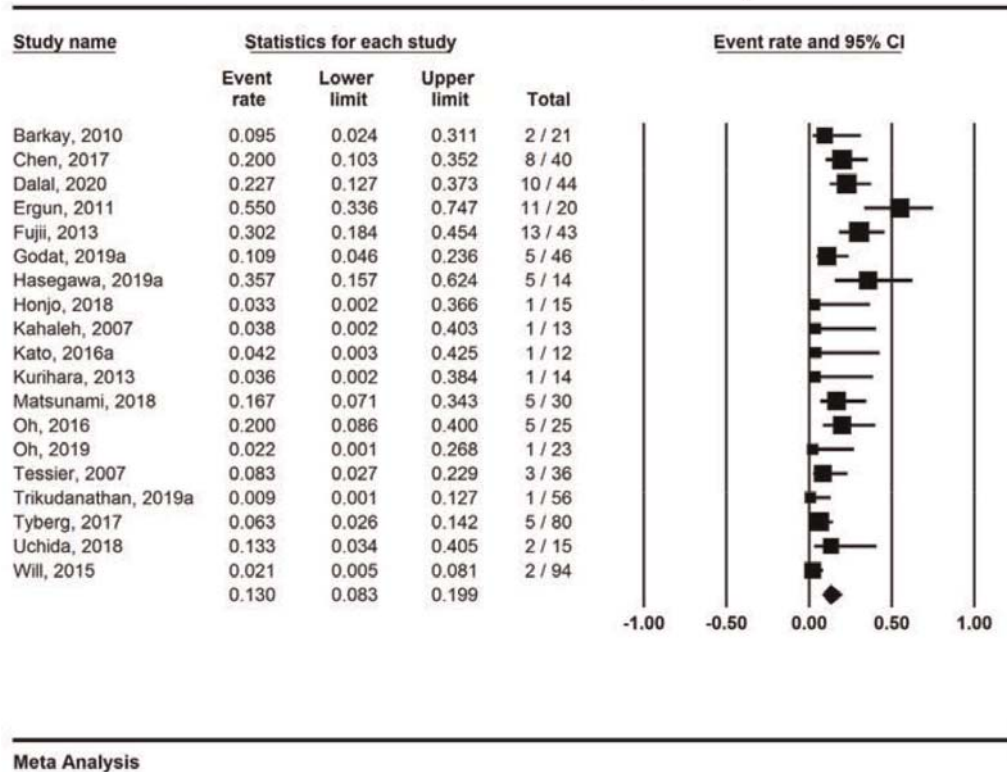

## Supplementary material

### Supplementary Fig. 5 Forest plot of moderate adverse events.

#### Adverse events (moderate)

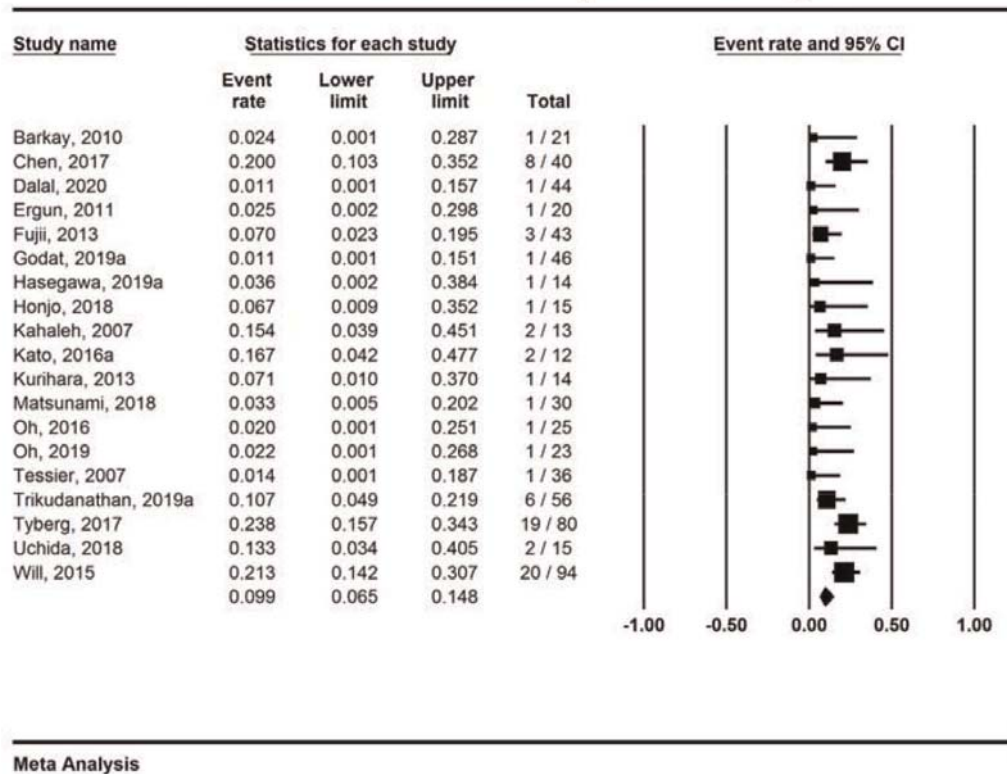

## Supplementary material

Supplementary Fig. 6 Forest plot of severe adverse events.

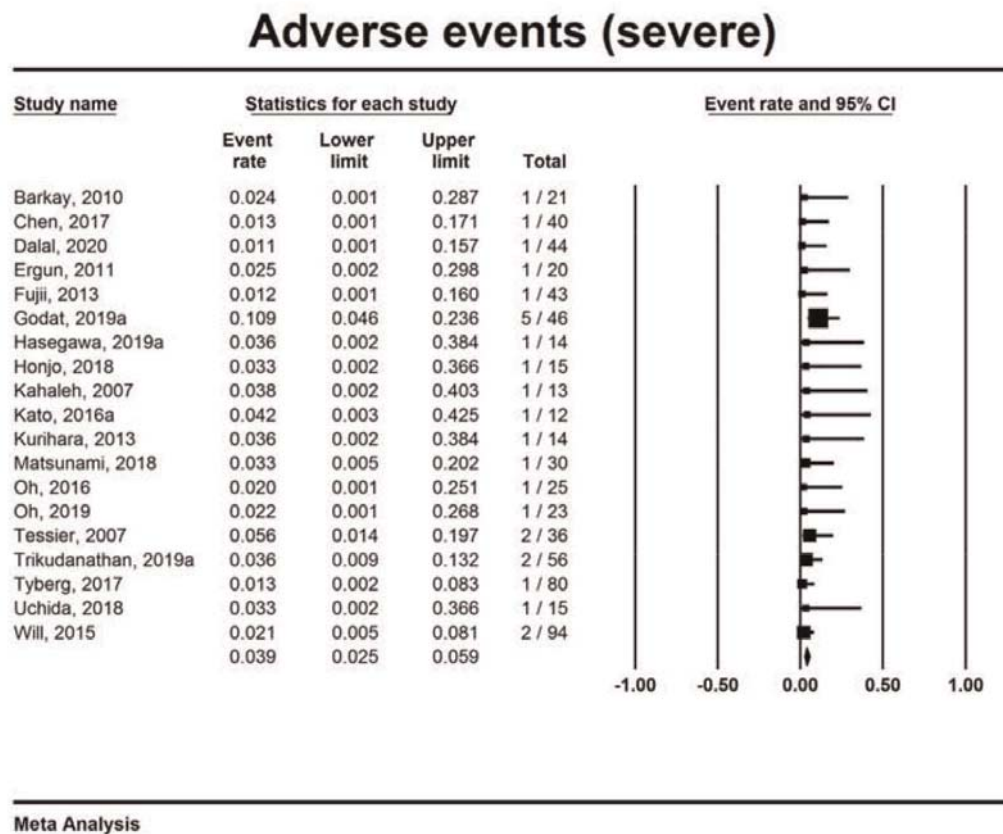

## Supplementary material

Supplementary Fig. 7 Funnel plot of publication bias.

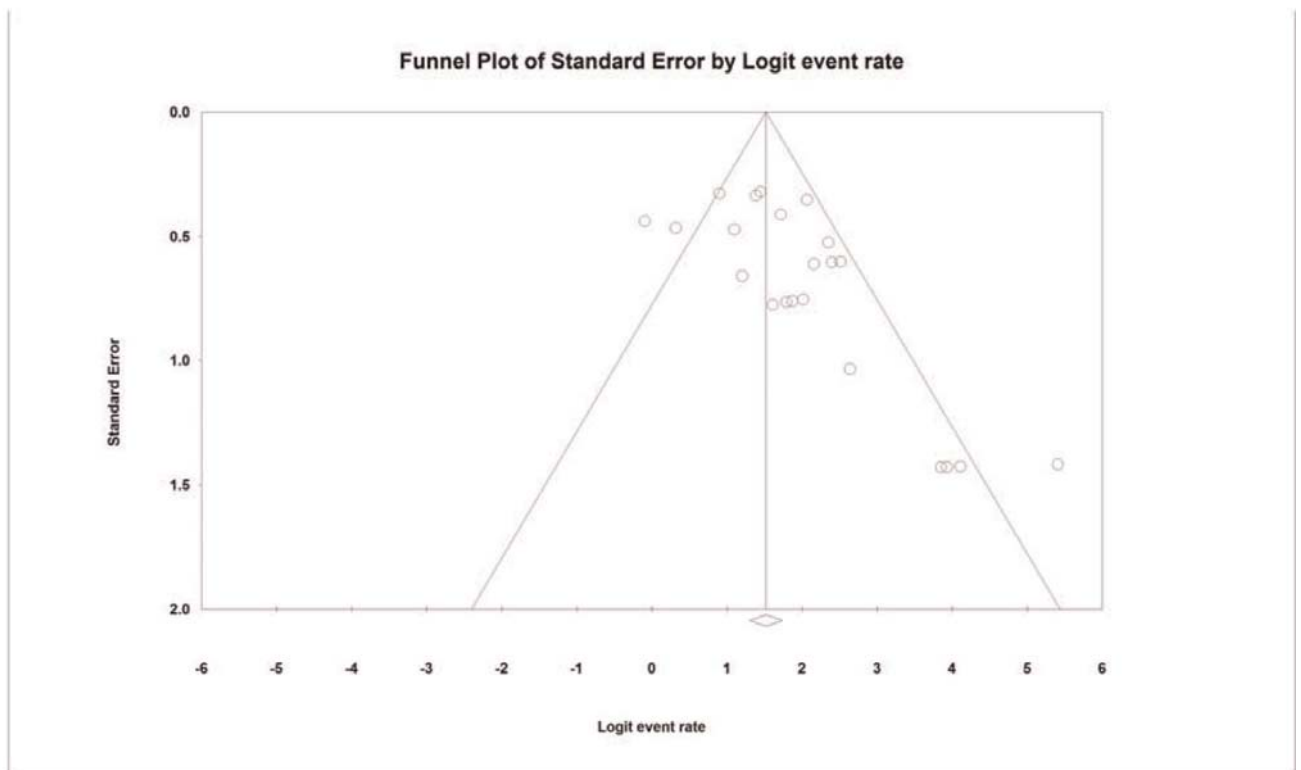



## Supplementary material

### Appendix 1 Literature search strategy. Number of results before and after deduplication

| Database       | # of initial hits | After deduplication |
|----------------|-------------------|---------------------|
| EBM Reviews    | 28                | 15                  |
| Embase         | 587               | 400                 |
| Medline        | 263               | 258                 |
| Scopus         | 647               | 389                 |
| Web of Science | 219               | 58                  |
| Totals         | 1744              | 1120                |

#### EBM Reviews:

((pancrea\* or santorini\* or wirsung\*) adj2 duct\*).ab,kw,ti. or "minor duodenal papilla\* ".ab,kw,ti.) AND (drain\* or stent\* or suction\*).ab,kw,ti. AND ((echoendoscop\* or EUS\* or endosonograph\*).ab,kw,ti. or (endoscop\* adj2 (ultraso\* or echo\*)).ab,kw,ti.)

#### Embase (1974+)

((exp pancreatic duct/ or ((pancrea\* or santorini\* or wirsung\*) adj2 duct\*).ab,kw,ti. or ""minor duodenal papilla\*"" .ab,kw,ti.) AND (drain\* or stent\* or suction\*).ab,kw,ti. AND (exp endoscopic ultrasonography/ or (echoendoscop\* or EUS\* or endosonograph\*).ab,kw,ti. or (endoscop\* adj2 (ultraso\* or echo\*)).ab,kw,ti.) NOT (exp child/ not exp adult/ or exp animal/ not exp human/ or exp case report/ or "case report".kw,pt,ti.) Limit to English

#### Ovid MEDLINE(R) 1946 to Present and Epub Ahead of Print, In-Process & Other Non-Indexed Citations and Ovid MEDLINE(R) Daily:

((exp Pancreatic Ducts/ or ((pancrea\* or santorini\* or wirsung\*) adj2 duct\*).ab,kw,ti. or "minor duodenal papilla\*"" .ab,kw,ti.) AND (exp Drainage/ or (drain\* or stent\* or suction\*).ab,kw,ti.) AND (exp Endosonography/ or (echoendoscop\* or EUS\* or endosonograph\*).ab,kw,ti. or (endoscop\* adj2 (ultraso\* or echo\*)).ab,kw,ti.) NOT (exp CHILD/ not exp ADULT/ or (exp Animals/ not Humans/) or exp Case Reports/ or "case report".kf,pt,ti.) Limit to English

#### Scopus:

((TITLE-ABS-KEY ( ( pancrea\* OR santorini\* OR wirsung\* ) W/2 duct\* ) OR TITLE-ABS-KEY ( "minor duodenal papilla\*" ) )) AND (TITLE-ABS-KEY(drain\* or stent\* or suction\*)) AND ((TITLE-ABS-KEY(echoendoscop\* or EUS\* or endosonograph\*) OR TITLE-ABS-KEY(endoscop\* W/2 (ultraso\* or echo\*)))) AND ( LIMIT-TO ( SRCTYPE,"j" ) ) AND ( LIMIT-TO ( LANGUAGE,"English" ) )

#### Web of Science:

TOPIC: ((pancrea\* or santorini\* or wirsung\*) NEAR/2 duct\*) OR TOPIC: ("minor duodenal papilla\*") AND TOPIC: (drain\* or stent\* or suction\*) AND TOPIC: (echoendoscop\* or EUS\* or endosonograph\*) OR TOPIC: (endoscop\* NEAR/2 (ultraso\* or echo\*)) Limit to English, (Article OR Meeting Abstract)

## Supplementary material

**Appendix 2** MOOSE checklist. From: Stroup DF, Berlin JA, Morton SC et al. for the Meta-analysis Of Observational Studies in Epidemiology (MOOSE) Group. Meta-analysis of Observational Studies in Epidemiology. A Proposal for Reporting. JAMA. 2000;283(15):2008-2012. doi: 10.1001/jama.283.15.2008

| Item no                                     | Recommendation                                                                                                                             | Reported on age no |
|---------------------------------------------|--------------------------------------------------------------------------------------------------------------------------------------------|--------------------|
| Reporting of background should include      |                                                                                                                                            |                    |
| 1                                           | Problem definition                                                                                                                         | 5,6                |
| 2                                           | Hypothesis statement                                                                                                                       | -                  |
| 3                                           | Description of study outcome(s)                                                                                                            | 5,6                |
| 4                                           | Type of exposure or intervention used                                                                                                      | 5,6                |
| 5                                           | Type of study designs used                                                                                                                 | 5,6                |
| 6                                           | Study population                                                                                                                           | 5,6                |
| Reporting of search strategy should include |                                                                                                                                            |                    |
| 7                                           | Qualifications of searchers (eg, librarians and investigators)                                                                             | 7, appendix 1      |
| 8                                           | Search strategy, including time period included in the synthesis and key words                                                             | 7, appendix 1      |
| 9                                           | Effort to include all available studies, including contact with authors                                                                    | 7                  |
| 10                                          | Databases and registries searched                                                                                                          | 7, appendix1       |
| 11                                          | Search software used, name and version, including special features used (eg, explosion)                                                    | Appendix1          |
| 12                                          | Use of hand searching (eg, reference lists of obtained articles)                                                                           | 7                  |
| 13                                          | List of citations located and those excluded, including justification                                                                      | Appendix1          |
| 14                                          | Method of addressing articles published in languages other than English                                                                    | -na-               |
| 15                                          | Method of handling abstracts and unpublished studies                                                                                       | 7                  |
| 16                                          | Description of any contact with authors                                                                                                    | 7                  |
| Reporting of methods should include         |                                                                                                                                            |                    |
| 17                                          | Description of relevance or appropriateness of studies assembled for assessing the hypothesis to be tested                                 | 7-8                |
| 18                                          | Rationale for the selection and coding of data (eg, sound clinical principles or convenience)                                              | 7-8                |
| 19                                          | Documentation of how data were classified and coded (eg, multiple raters, blinding and inter-rater reliability)                            | -na-               |
| 20                                          | Assessment of confounding (eg, comparability of cases and controls in studies where appropriate)                                           | -na-               |
| 21                                          | Assessment of study quality, including blinding of quality assessors, stratification or regression on possible predictors of study results | 8                  |
| 22                                          | Assessment of heterogeneity                                                                                                                | 9                  |



## Supplementary material

|                                     |                                                                                                                                                                                                                                                                              |                                    |
|-------------------------------------|------------------------------------------------------------------------------------------------------------------------------------------------------------------------------------------------------------------------------------------------------------------------------|------------------------------------|
| 23                                  | Description of statistical methods (eg, complete description of fixed or random effects models, justification of whether the chosen models account for predictors of study results, dose-response models, or cumulative meta-analysis) in sufficient detail to be replicated | 9                                  |
| 24                                  | Provision of appropriate tables and graphics                                                                                                                                                                                                                                 | Tables 1,2, supplemental materials |
| Reporting of results should include |                                                                                                                                                                                                                                                                              |                                    |
| 25                                  | Graphic summarizing individual study estimates and overall estimate                                                                                                                                                                                                          | Supplementary materials            |
| 26                                  | Table giving descriptive information for each study included                                                                                                                                                                                                                 | Supplementary Table 1              |
| 27                                  | Results of sensitivity testing (eg, subgroup analysis)                                                                                                                                                                                                                       | 11                                 |
| 28                                  | Indication of statistical uncertainty of findings                                                                                                                                                                                                                            | 11,12                              |

| Item No                                 | Recommendation                                                                                                            | Reported on Page No |
|-----------------------------------------|---------------------------------------------------------------------------------------------------------------------------|---------------------|
| Reporting of discussion should include  |                                                                                                                           |                     |
| 29                                      | Quantitative assessment of bias (eg, publication bias)                                                                    | 12                  |
| 30                                      | Justification for exclusion (eg, exclusion of non-English language citations)                                             | -na-                |
| 31                                      | Assessment of quality of included studies                                                                                 | Supple Table 2      |
| Reporting of conclusions should include |                                                                                                                           |                     |
| 32                                      | Consideration of alternative explanations for observed results                                                            | 13-15               |
| 33                                      | Generalization of the conclusions (ie, appropriate for the data presented and within the domain of the literature review) | 13-15               |
| 34                                      | Guidelines for future research                                                                                            | 15                  |

## Supplementary material

**Appendix 3** PRISMA checklist. From: Moher D, Liberati A, Tetzlaff J, Altman DG, The PRISMA Group (2009). Preferred Reporting Items for Systematic Reviews and Meta-Analyses: The PRISMA Statement. PLoS Med 6(7): e1000097. doi:10.1371/journal.pmed1000097

| Section/topic             | # | Checklist item                                                                                                                                                                                                                                                                                              | Reported on page # |
|---------------------------|---|-------------------------------------------------------------------------------------------------------------------------------------------------------------------------------------------------------------------------------------------------------------------------------------------------------------|--------------------|
| <b>Title</b>              |   |                                                                                                                                                                                                                                                                                                             |                    |
| Title                     | 1 | Identify the report as a systematic review, meta-analysis, or both.                                                                                                                                                                                                                                         | 1                  |
| <b>Abstract</b>           |   |                                                                                                                                                                                                                                                                                                             |                    |
| Structured summary        | 2 | Provide a structured summary including, as applicable: background; objectives; data sources; study eligibility criteria, participants, and interventions; study appraisal and synthesis methods; results; limitations; conclusions and implications of key findings; systematic review registration number. | 4                  |
| <b>Introduction</b>       |   |                                                                                                                                                                                                                                                                                                             |                    |
| Rationale                 | 3 | Describe the rationale for the review in the context of what is already known.                                                                                                                                                                                                                              | 6-7                |
| Objectives                | 4 | Provide an explicit statement of questions being addressed with reference to participants, interventions, comparisons, outcomes, and study design (PICOS).                                                                                                                                                  | 8-9                |
| <b>Methods</b>            |   |                                                                                                                                                                                                                                                                                                             |                    |
| Protocol and registration | 5 | Indicate if a review protocol exists, if and where it can be accessed (e.g., Web address), and, if available, provide registration information including registration number.                                                                                                                               | NA                 |
| Eligibility criteria      | 6 | Specify study characteristics (e.g., PICOS, length of follow-up) and report characteristics (e.g., years considered, language, publication status) used as criteria for eligibility, giving rationale.                                                                                                      | 8                  |
| Information sources       | 7 | Describe all information sources (e.g., databases with dates of coverage, contact with study authors to identify additional studies) in the search and date last searched.                                                                                                                                  | 8                  |
| Search                    | 8 | Present full electronic search strategy for at least one database, including any limits used, such that it could be repeated.                                                                                                                                                                               | Suppl Appendix-1   |

## Supplementary material

|                                    |    |                                                                                                                                                                                                                        |       |
|------------------------------------|----|------------------------------------------------------------------------------------------------------------------------------------------------------------------------------------------------------------------------|-------|
| Study selection                    | 9  | State the process for selecting studies (i.e., screening, eligibility, included in systematic review, and, if applicable, included in the meta-analysis).                                                              | 8-9   |
| Data collection process            | 10 | Describe method of data extraction from reports (e.g., piloted forms, independently, in duplicate) and any processes for obtaining and confirming data from investigators.                                             | 9     |
| Data items                         | 11 | List and define all variables for which data were sought (e.g., PICOS, funding sources) and any assumptions and simplifications made.                                                                                  | 9     |
| Risk of bias in individual studies | 12 | Describe methods used for assessing risk of bias of individual studies (including specification of whether this was done at the study or outcome level), and how this information is to be used in any data synthesis. | 11    |
| Summary measures                   | 13 | State the principal summary measures (e.g., risk ratio, difference in means).                                                                                                                                          | 13-15 |
| Synthesis of results               | 14 | Describe the methods of handling data and combining results of studies, if done, including measures of consistency (e.g., $I^2$ ) for each meta-analysis.                                                              | 16    |
